# Supplementary material for: A simple spray reaction synthesis and characterization of hierarchically porous SnO2 microspheres for an enhanced dye sensitized solar cell
Source: Royal Society of Chemistry journal article supplement (doi:10.1039/c6ra27235e), 2017-01-01
Supplement: c6ra27235e1.pdf [file c6ra27235e1.pdf]

## Supplementary Information

### Facile spray reaction synthesis and characterization of hierarchically porous SnO<sub>2</sub> microspheres for enhanced dye-sensitized solar cell

Hui Zhang,<sup>\*a</sup> Rong Wu,<sup>a</sup> Hong Xu,<sup>a</sup> Fan Li,<sup>\*b</sup> Shuo Wang,<sup>a</sup> Jinshu Wang,<sup>\*c</sup> and Tingting Zhang<sup>a†</sup>

<sup>a</sup> School of Science, Beijing Jiaotong University, Beijing 100044, PR China. E-mail: hzhang1@bjtu.edu.cn

<sup>b</sup> College of Environmental and Energy Engineering, Beijing University of Technology, Beijing 100124, PR China. E-mail: vanadiumli@bjut.edu.cn

<sup>c</sup> College of Materials, Beijing University of Technology, Beijing 100124, PR China. E-mail: wangjsh@bjut.edu.cn

#### Table of contents

|                  |                                                                                                                          |                                                                                                                                                                              |
|------------------|--------------------------------------------------------------------------------------------------------------------------|------------------------------------------------------------------------------------------------------------------------------------------------------------------------------|
| 1                | <b>Figure S1.</b>                                                                                                        | Schematic set-up for spray reaction process.                                                                                                                                 |
|                  | <b>Figure S2.</b>                                                                                                        | Representative EDX spectrum (right) of synthesized SnO <sub>2</sub> spheres (left).                                                                                          |
|                  | <b>Figure S3.</b>                                                                                                        | Rietveld-refined XRD patterns of SnO <sub>2</sub> porous spheres calcined at 500-800 °C:<br>— Experimental pattern, □ Refined pattern,   difference pattern, —(h k l) lines. |
|                  | <b>Figure S4.</b>                                                                                                        | BET plots of SnO <sub>2</sub> porous spheres calcined at 600-800 °C.                                                                                                         |
|                  | <b>Figure S5.</b>                                                                                                        | The fitting results of O1s XPS spectra measured for SnO <sub>2</sub> spheres annealed at 500-700 °C.                                                                         |
|                  | <b>Figure S6.</b>                                                                                                        | UV-Vis absorption spectra of 600 °C SnO <sub>2</sub> spheres.                                                                                                                |
|                  | <b>Figure S7.</b>                                                                                                        | Histogram for the contributions to current density of dye loading and light scattering capability.                                                                           |
|                  | <b>Figure S8.</b>                                                                                                        | I-V curves for cells with different anode thickness using SnO <sub>2</sub> microspheres heated at 600 °C as scattering layer.                                                |
|                  | <b>Table S1.</b>                                                                                                         | Assignment of the bands in FTIR spectra of N719, N719-P25, and N719-S500.                                                                                                    |
| <b>Table S2.</b> | Summary of $\Delta\nu$ values for carboxylate/carboxylic acid group-SnO <sub>2</sub> /TiO <sub>2</sub> system compounds. |                                                                                                                                                                              |
| 2                | <b><math>E_g^{\text{eff}}</math> calculation</b>                                                                         | Calculation for the SnO <sub>2</sub> effective band gap energy                                                                                                               |

## 1. Figures and tables

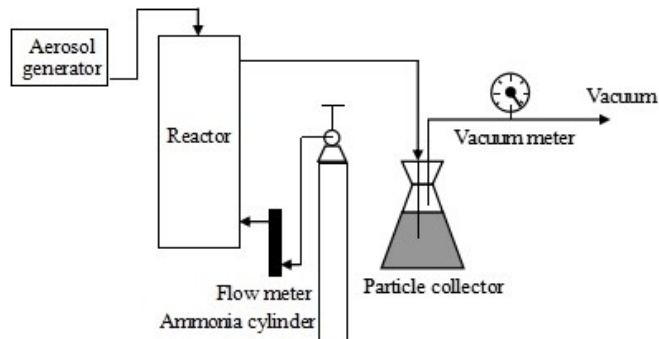

**Figure S1.** Schematic set-up for spray reaction process.

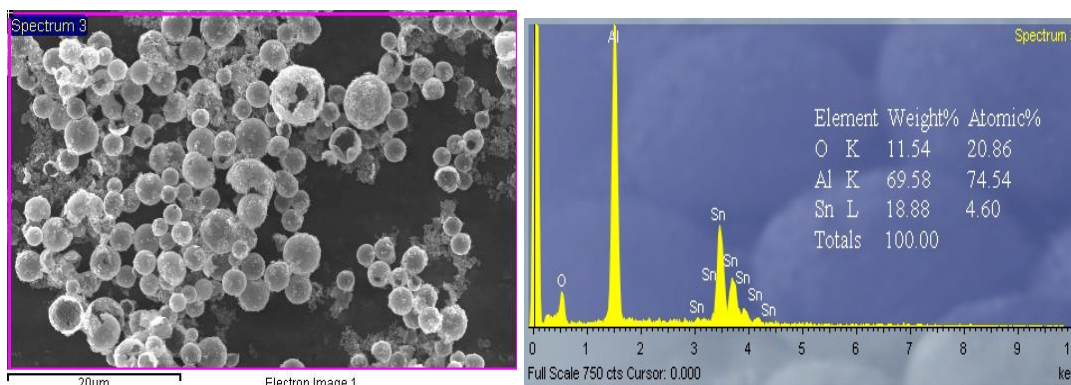

**Figure S2.** Representative EDX spectrum (right) of synthesized SnO<sub>2</sub> spheres (left).

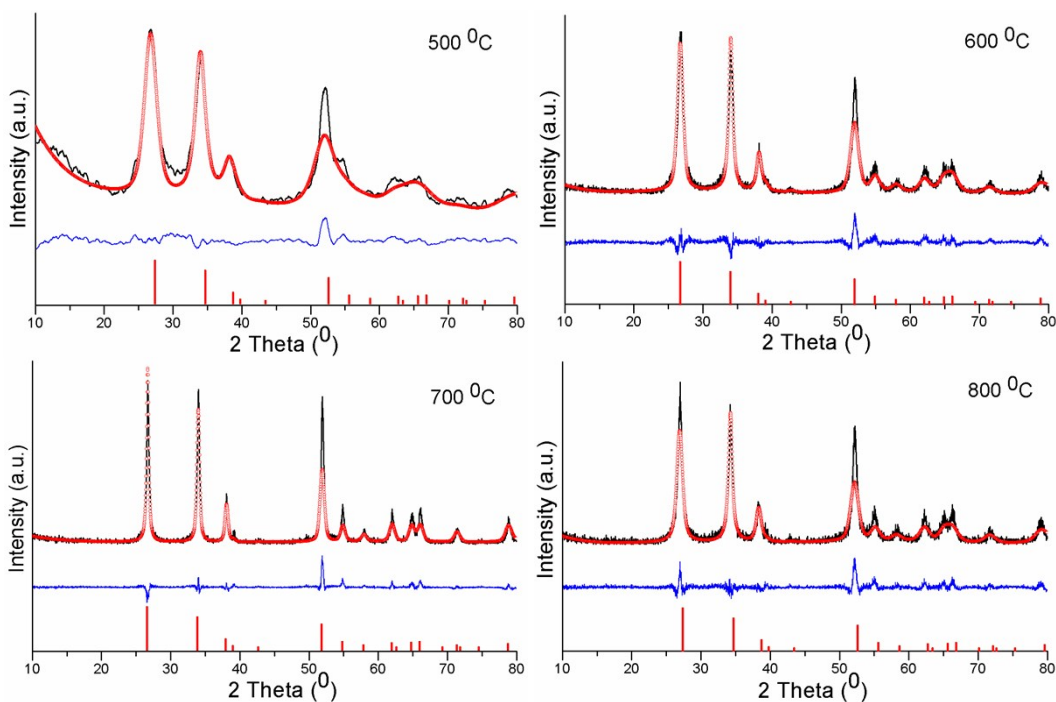

**Figure S3.** Rietveld-refined XRD patterns of SnO<sub>2</sub> porous spheres calcined at 500-800 °C: —Experimental pattern, — Refined pattern, — difference pattern, | (h k l) lines.

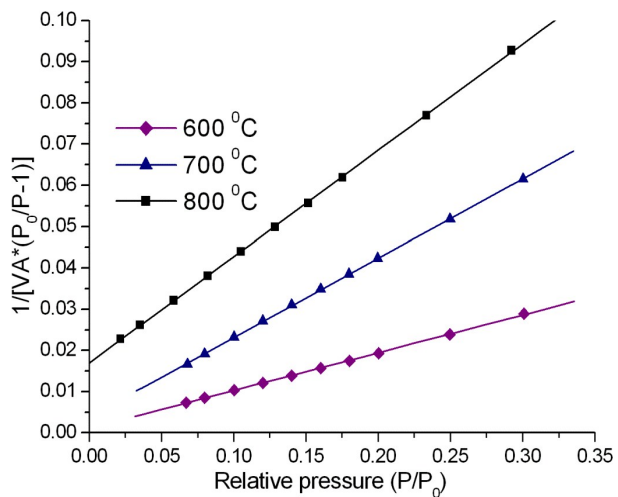

**Figure S4.** BET plots of SnO<sub>2</sub> porous spheres calcined at 600-800 °C.

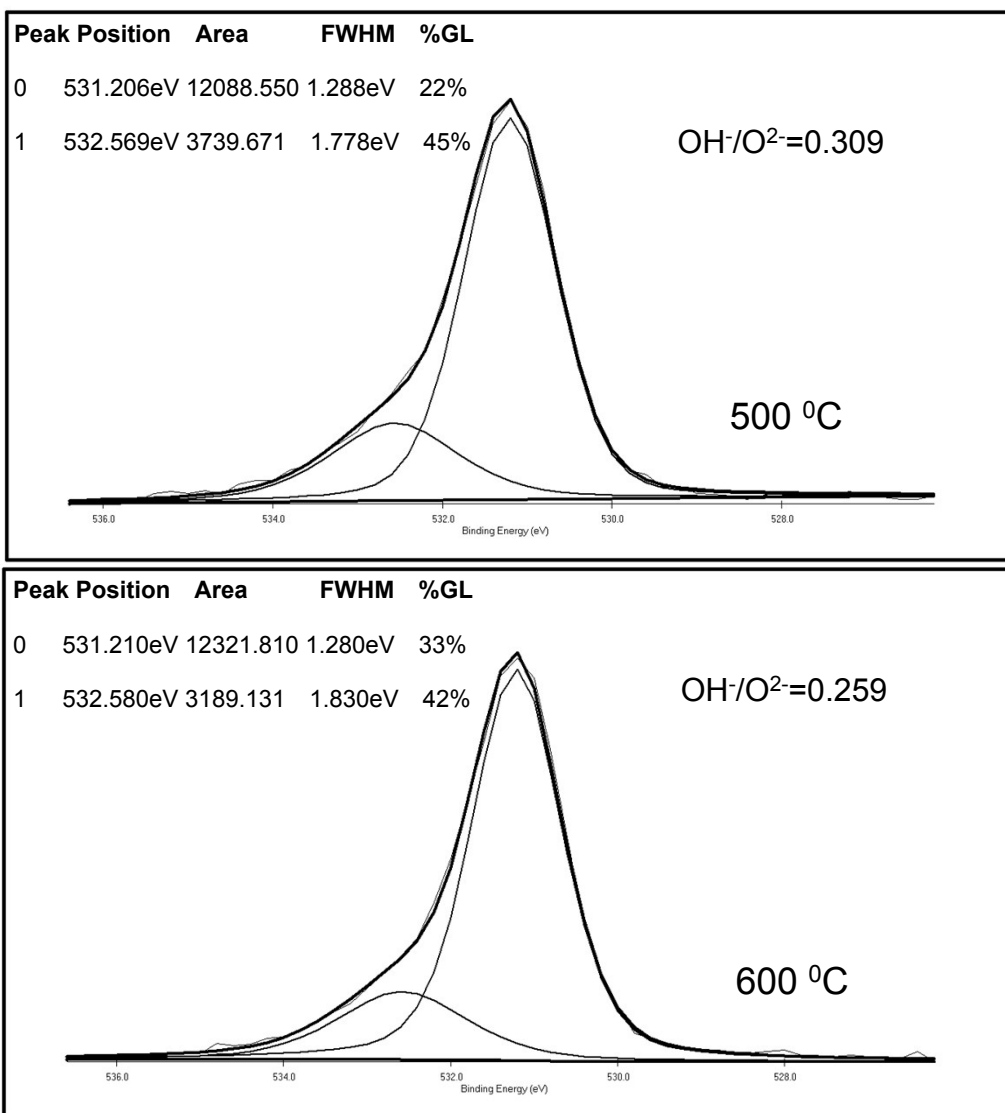

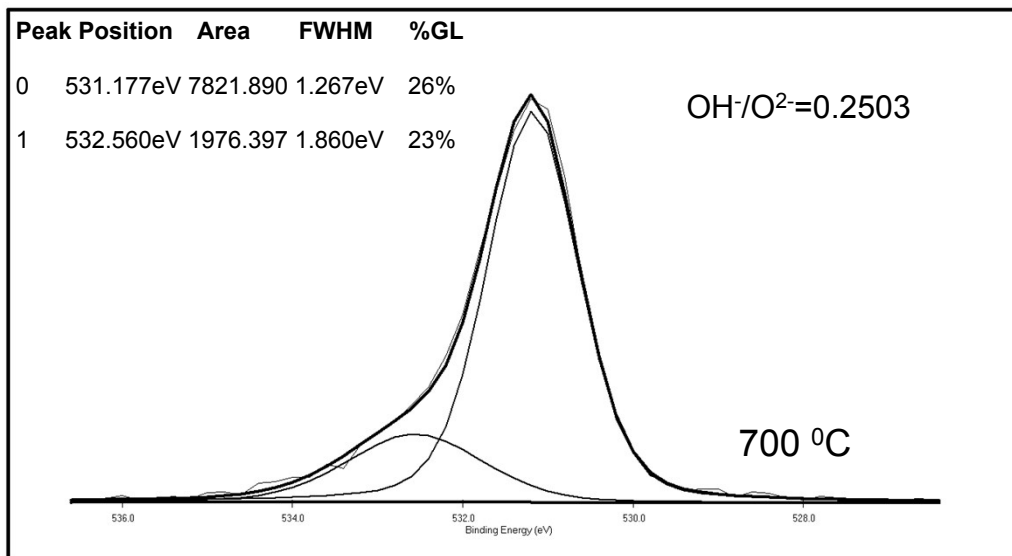

**Figure S5.** The fitting results of O1s XPS spectra measured for SnO<sub>2</sub> spheres annealed at 500-700 °C.

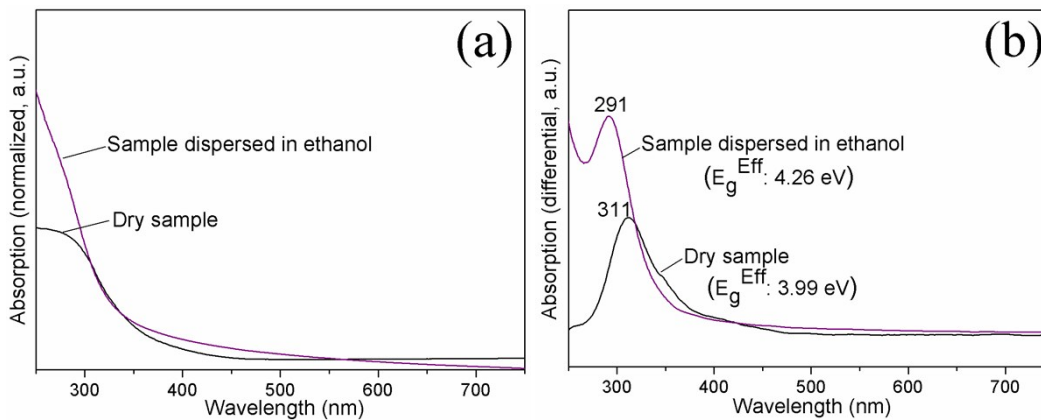

**Figure S6.** (a) UV-Vis absorption spectra and corresponding differential absorption spectra of the dry 600 °C SnO<sub>2</sub> spheres and the 600 °C SnO<sub>2</sub> spheres dispersed in ethanol.

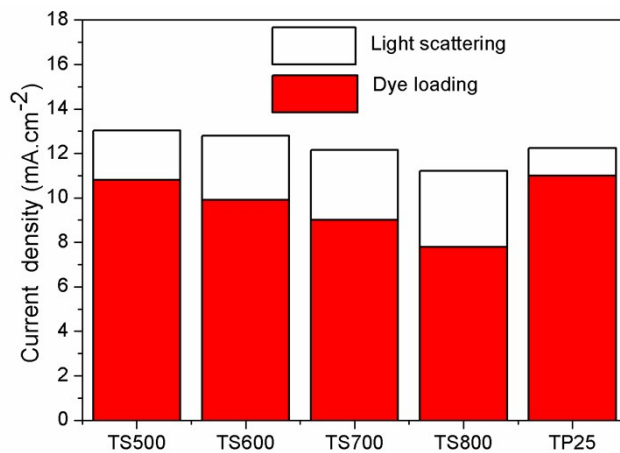

**Figure S7.** Histogram for the contributions to current density of dye loading and light scattering capability.

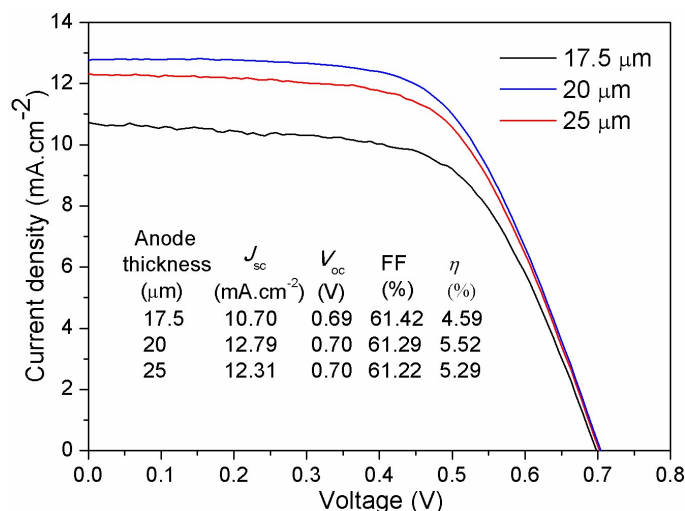

**Figure S8.** I-V curves for cells with different anode thickness using SnO<sub>2</sub> microspheres heated at 600 °C as scattering layer.

**Table S1.** Assignment of the Bands in FTIR Spectra of N719, N719-P25, and N719-S500.

| N719<br>v(cm <sup>-1</sup> ) | N719-S500<br>v(cm <sup>-1</sup> ) | N719-P25<br>v(cm <sup>-1</sup> ) | Assignment                 |
|------------------------------|-----------------------------------|----------------------------------|----------------------------|
| 1232                         | 1237                              | 1266                             | C-O                        |
| 1373                         | 1377                              | 1382                             | COO <sub>-sym</sub>        |
| 1404                         | 1408                              | 1430                             | bpy                        |
| 1468                         | 1461                              | 1469                             | δ(CH <sub>2</sub> ) in TBA |
| 1546                         | 1541                              | 1560                             | bpy                        |
| 1607                         | 1621                              | 1610                             | COO <sub>-asym</sub>       |
| 1712                         | 1713                              | 1693                             | C=O                        |
| 2101                         | —                                 | 2079                             | NC                         |
| 2875                         | 2874                              | 2852                             | CH <sub>2, asym</sub>      |
| 2933                         | 2930                              | 2922                             | CH <sub>2, sym</sub>       |
| 2963                         | 2965                              | 2971                             | CH <sub>3</sub>            |

**Table S2.** Summary of Δv Values for Carboxylate/Carboxylic Acid Group-SnO<sub>2</sub>/TiO<sub>2</sub> System Compounds.

| Compound  | $\nu_{asym}(\text{COO})$<br>(cm <sup>-1</sup> ) | $\nu_{sym}(\text{COO})$<br>(cm <sup>-1</sup> ) | Δv<br>(cm <sup>-1</sup> ) | Binding mode |
|-----------|-------------------------------------------------|------------------------------------------------|---------------------------|--------------|
| N719      | 1607                                            | 1373                                           | 234                       | N/A          |
| N719-S500 | 1621                                            | 1377                                           | 244                       | Unidentate   |
| N719-P25  | 1610                                            | 1382                                           | 228                       | Bridging     |

## 2. Calculation for the SnO<sub>2</sub> effective band gap energy ( $E_g^{eff}$ )

When the SnO<sub>2</sub> crystallite radius is near or larger than the exciton Bohr radius (2.7 nm) of bulk SnO<sub>2</sub>,  $E_g^{eff}$  of SnO<sub>2</sub> crystallite can be approximately calculated by following equation.

$$E_g^{eff} \approx E_g^{bulk} + \frac{h^2 \pi^2}{2\mu R^2} \quad (1)$$

where  $E_g^{bulk}$  is the bulk band gap energy,  $R$  is the crystallite radius,  $h$  is the reduced Planck constant,  $\mu$  is the effective reduced mass ( $\mu \approx 0.275m_e$ ).
